# Supplementary material for: Diagnosis and Risk Prediction of Dilated Cardiomyopathy in the Era of Big Data and Genomics
Source: PubMed Central journal article supplement (PMC7956169; doi:10.3390/jcm10050921), 2021-02-26
Supplement: jcm-10-00921-s001.pdf [file jcm-10-00921-s001.pdf]

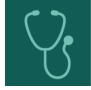

**Table 1.** Non-exhaustive list of clinical modalities that may aid in differential diagnosis of DCM.

| Modality                | DCM                                                                                                                | Ischemic HF                                                                                                         | ACM                                                                                                                                     | HCM                                                                                                      | NCCM                                                                                                            | RCM                                                                                                                                          |
|-------------------------|--------------------------------------------------------------------------------------------------------------------|---------------------------------------------------------------------------------------------------------------------|-----------------------------------------------------------------------------------------------------------------------------------------|----------------------------------------------------------------------------------------------------------|-----------------------------------------------------------------------------------------------------------------|----------------------------------------------------------------------------------------------------------------------------------------------|
| <b>History</b>          | Possible positive family history, young age                                                                        | Atherosclerosis, older age                                                                                          | Possible positive family history, young age, syncope or palpitations                                                                    | Possible positive family history, young age                                                              | Possible positive family history, young age                                                                     | Possible positive family history, young age                                                                                                  |
| <b>ECG</b>              | Low QRS voltage, conduction disorders, left axis deviation, t-wave abnormalities*                                  | Pathological Q waves, ST segment abnormalities, conduction disorders                                                | Inverted T-waves, late potentials, epsilon wave, and/or terminal activation delay typically preceding structural changes                | High QRS voltages indicative of LVH and abnormal repolarisation                                          | ECG characteristic of LVH and abnormal repolarisation                                                           | Low QRS voltage, conduction disturbances, pseudo-infarction Q-waves                                                                          |
| <b>Echocardiography</b> | Dilated LV and/or systolic impairment                                                                              | Dilated ventricle with systolic impairment, typically by coronary perfusion region                                  | RV dilatation or dysfunction, RV dyskinesia or aneurysm. Abnormal LV function in absence of RV dysfunction is rare (left-dominant ACM). | LVH ( $\geq 13$ mm), diastolic dysfunction, obstructed LV outflow tract, (supra)normal systolic function | Ventricular hypertrophy with compacted and non-compacted (trabeculae) myocardium                                | Not dilated ventricular with normal or increased wall thickness, restrictive filling pattern (Doppler) and atrial dilation                   |
| <b>CMR</b>              | Dilated LV and systolic impairment, possible hypokinetic wall motion abnormalities, delayed enhancement (mid-wall) | Possible dilated LV and systolic impairment, akinetic wall motion abnormalities, subendocardial delayed enhancement | Regional RV akinesia, dyskinesia or dyssynchronous RV contraction, biventricular fibrofatty replacement of LV or RV wall.               | LVH, apical and lateral wall hypertrophy, obstructed LV outflow tract, septal delayed enhancement        | Hypertrabeculation (noncompacted to compacted ratio of $>2.3$ ), trabeculated LV mass $>20\%$ of global LV mass | Normal sized ventricles, enlarged atria, tubular or indented ventricular cavities, extra-cardiac findings associated amyloidosis/sarcoidosis |
| <b>Genetic Testing</b>  | Pathogenic variants in sarcomeric, desmosomal and/or nuclear envelope proteins                                     | Not indicated                                                                                                       | Pathogenic variants in mostly desmosomal proteins                                                                                       | Pathogenic variants in mostly sarcomeric proteins                                                        | Pathogenic variants in mostly sarcomeric proteins                                                               | Dependent on aetiology of RCM                                                                                                                |
| <b>CAG</b>              | Normal                                                                                                             | Abnormal (or normal in case of microvascular disease or coronary spasm)                                             | Normal                                                                                                                                  | Normal                                                                                                   | Normal                                                                                                          | Normal                                                                                                                                       |

\* Genotype-phenotype associations may shed light on the aetiology of DCM. See text for examples. Abbreviations: ACM (arrhythmogenic cardiomyopathy), CMR (cardiac magnetic resonance imaging), CAG (coronary angiogram), DCM (dilated cardiomyopathy), ECG (electrocardiogram) HCM (hypertrophic cardiomyopathy), LV (left ventricle) LVH (left ventricular hypertrophy), RCM (restrictive cardiomyopathy), RV (right ventricle).
